# Supplementary material for: Large-pore-size membranes tuned by chemically vapor deposited nanocoatings for rapid and controlled desalination
Source: Royal Society of Chemistry journal article supplement (doi:10.1039/d0ra07629e), 2020-01-01
Supplement: d0ra07629e1.pdf [file d0ra07629e1.pdf]

## Supplementary material

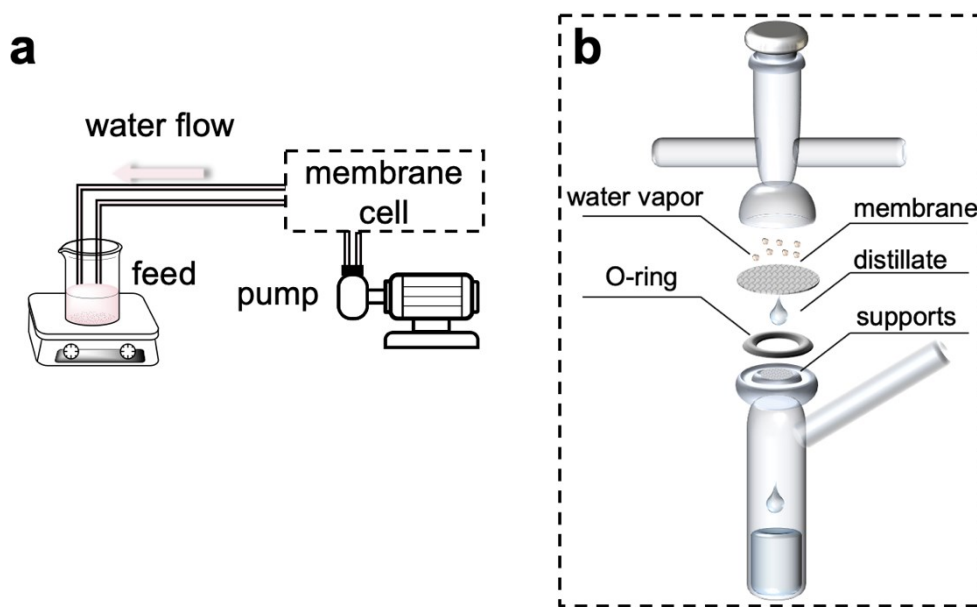

**Fig. S1.** Schematic illustration of (a) MD setup (b) membrane cell.

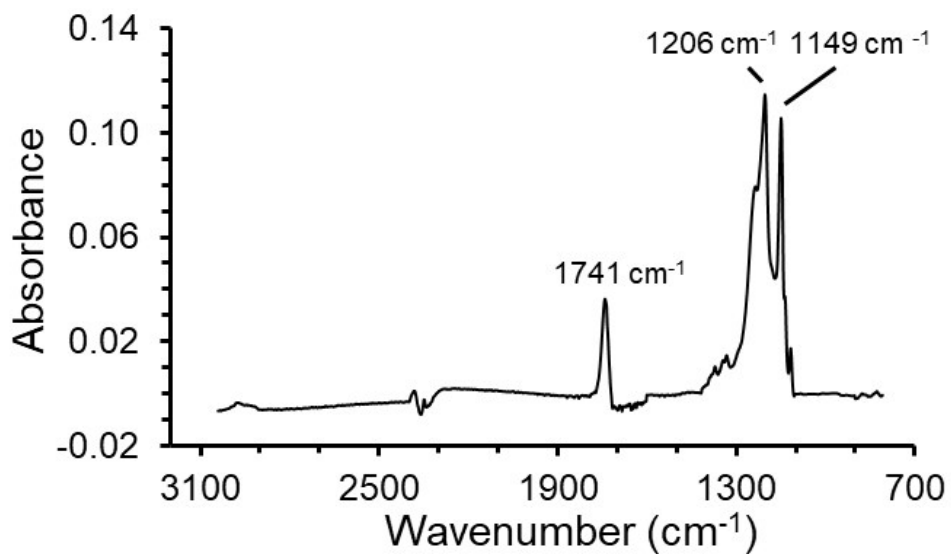

**Fig. S2.** FTIR spectrum of the PHDFA coating on the reference surface with deposition time of 30 min.
